# Supplementary material for: Prevalence and Correlates of Suicide Attempts in High-Risk Populations: A Cohort study among patients receiving opioid Agonist Therapy in Norway
Source: Research Square preprint supplement (doi:10.21203/rs.3.rs-960846/v1), 2021-10-21
Supplement: Supplementary file 1 [file 3ef64baba7899c3fd400c16c.xlsx]

## Sheet: Table 3
Table 3: Negative binomial regression of the association between suicide attempts and their risk factors (N = 595)
	IRR (95 % CI)
	Suicide attempt
Sex
Males	1.0 (ref.)
Females	1.2 (0.9–1.6)
Level of education
- Not completed primary school	1.0 (ref.)
- Completed primary school (9 years)	0.8 (0.4–1.5)
- Completed high school (12 years)	0.8 (0.4–1.5)
- ≤ 3 years of college or university	1.0 (0.5–2.1)
- > 3 years of college or university	0.6 (0.2–2.1)
Early onset of substance use1)	1.7 (1.3–2.2)
IRR: Incidence rate ratio; CI: Confidence interval
1) The early onset of substance use is defined as substance use before the age of 13 (< 13).
Legends: The table displays the association between education, sex, early onset of substance use, and suicide attempts among patients who were enrolled in opioid agonist therapy.
