# Supplementary material for: Prevalence and Correlates of Suicide Attempts in High-Risk Populations: A Cohort study among patients receiving opioid Agonist Therapy in Norway
Source: Research Square preprint supplement (doi:10.21203/rs.3.rs-960846/v1), 2021-10-21
Supplement: Supplementary file 2 [file 88f2d6ee372113ab14a72c85.xlsx]

## Sheet: Table 2
Table 2: Binary logistic regression of the association between suicide attempts and their risk factors (N = 595)
	Unadjusted OR (95 % CI)
	Injected substances during the past 30 days	Substance use during the past 30 days
		Alcohol	Amphetamines	Benzodiazepines	Cannabis	Cocaine	Opioids
Suicide attempt (ever)	0.9 (0.6–1.3)	0.9 (0.7–1.3)	1.0 (0.7–1.3)	1.0 (0.7–1.4)	1.2 (0.9–1.7)	1.3 (0.6–3.0)	1.4 (0.9–2.0)
OR: Odds ratio; CI: Confidence Interval
Legends: The table displays the unadjusted OR of the association between suicide attempts, injecting substance use, and the types of substances used during the 30 days leading up to the health assessment.
